# Supplementary material
Source: publisher figshare collection journal article supplement (https://springernature.figshare.com/ndownloader/files/18713561)
Supplement: Supplementary file [file 18713561]

**Additional File 1.** Normalized MAO-A mRNA counts from Nanostring nCounter analysis.

| <b>Cell Lines</b> | <b>Adherent</b> | <b>Tumorspheres</b> |
|-------------------|-----------------|---------------------|
| BT20              | 63.53           | 258.63              |
| BT474             | 42.68           | 496.09              |
| MCF-7             | 35.97           | 550.82              |
| MDA-MB-361        | 118.65          | 320.39              |
| MDA-MB-436        | 47.54           | 52.69               |
| T47D              | 36.32           | 64.63               |
| ZR75-1            | 39.66           | 71.93               |
| MDA-MB-157        | 82.81           | 627.16              |
| HCC1954           | 270.2           | 330.55              |
| Brain             | 1566.64         |                     |

MAO-A abundance was determined from total RNA using Nanostring nCounter and custom probe sets. mRNA read counts were normalized by subtracting negative probe counts using Nanostring nSolver software. Human Brain RNA was included as a positive control.
